# Supplementary material
Source: Springer Nature journal article supplement (https://www.springermedizin.de/resource/supplementary/12936_2009_1128_MOESM1_ESM.pdf/9549918)

Village group

'Control'  
'At-risk'

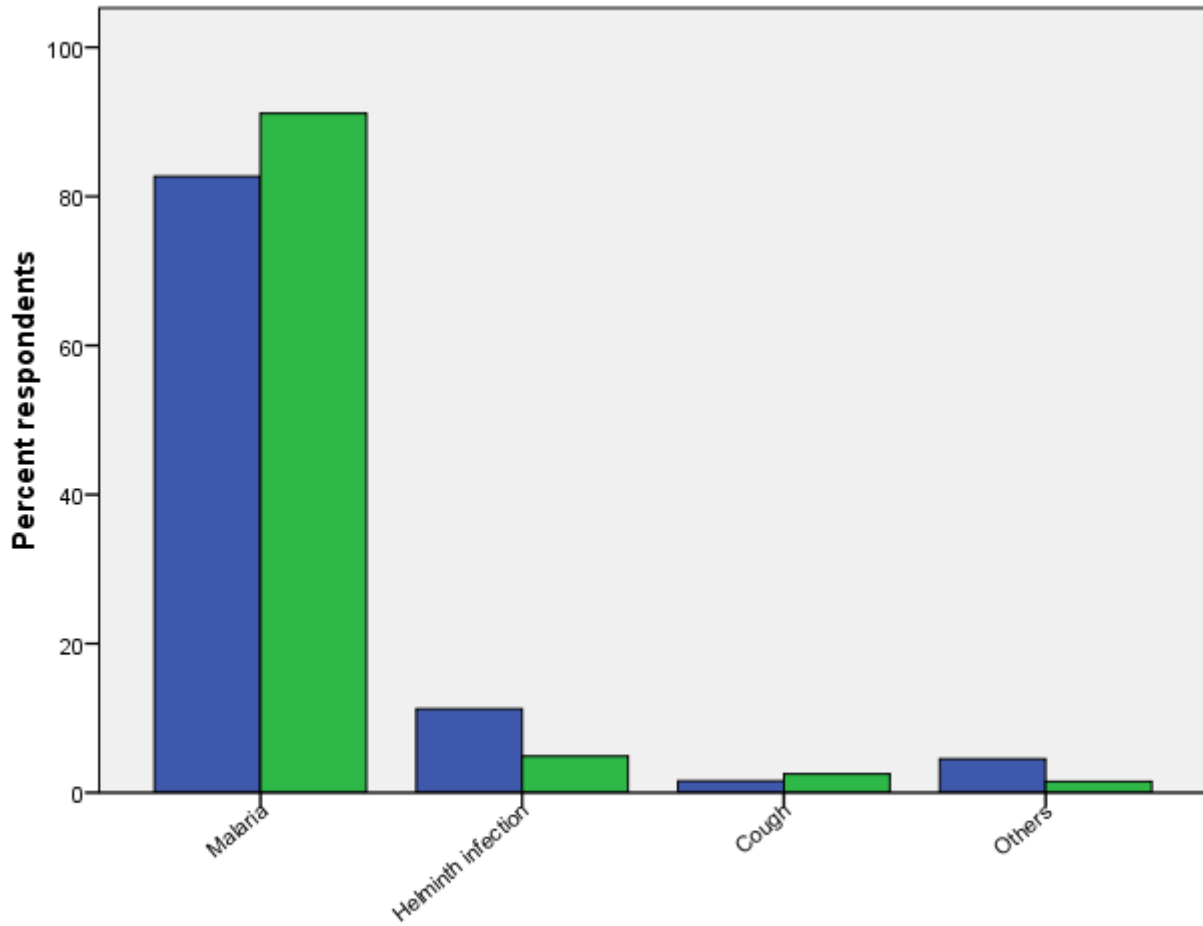

Supplement: MOESM1 [file 9549918]
